# Supplementary material for: Toxicological Evaluation of Lagerstroemia speciosa and Lagerstroemia tomentosa Extracts Using a Liver Organ-on-a-Chip System
Source: Research Square preprint supplement (doi:10.21203/rs.3.rs-8478168/v1), 2026-01-08
Supplement: Supplementary file 1 [file ddceb33ebbd08f88a5680ef0.pdf]

## Supplementary information

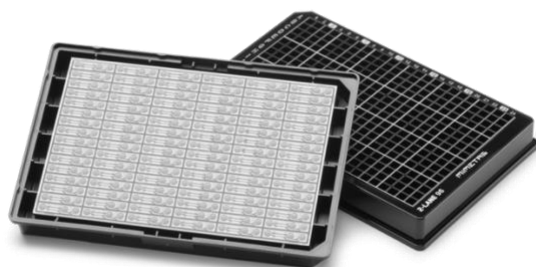

**Supplementary Fig. 1.** Image of a 2-lane OrganoPlate (cat#9605-400-B, MIMETAS)

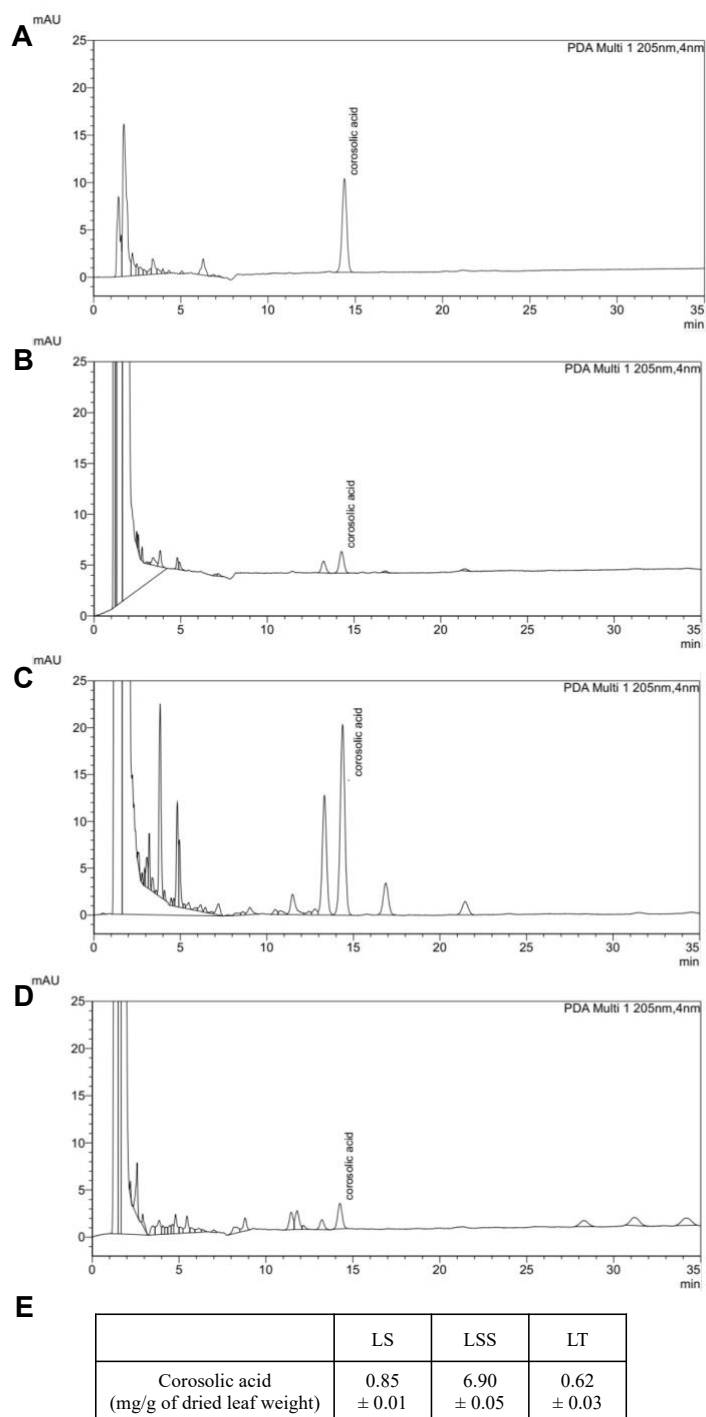

**Supplementary Fig. 2.** (A–D) Chromatograms of the standard (A) and the LS (B), LSS (C), and LT (D) extracts. The peak corresponding to corosolic acid is indicated in each panel. (E) Summary of the corosolic acid content in the LS, LSS, and LT extracts.
